# Supplementary material for: Enhanced Heterogeneous Fenton Degradation of Organic Dyes by Bimetallic Zirconia-Based Catalysts
Source: MDPI journal article supplement (doi:10.3390/molecules29092074), 2024-04-30
Supplement: s1 [file s1]

## Supplementary Information

# Enhanced heterogeneous Fenton degradation of organic dyes by bimetallic zirconia-based catalysts

**Eleonora Aneggi<sup>1,\*</sup>, Sajid Hussain<sup>2,3</sup>, Walter Baratta<sup>1</sup>, Daniele Zuccaccia<sup>1</sup> and Daniele Goi<sup>2</sup>**

<sup>1</sup> Dipartimento di Scienze AgroAlimentari, Ambientali e Animali, Sezione di Chimica, Università di Udine, e INSTM, 33100 Udine, Italy;

<sup>2</sup> Dipartimento Politecnico di Ingegneria e Architettura, Università di Udine, e INSTM, 33100 Udine, Italy;

<sup>3</sup> Dipartimento di Ingegneria Industriale, Università di Padova, 35131 Padova, Italy

\* Correspondence: [eleonora.aneggi@uniud.it](mailto:eleonora.aneggi@uniud.it); Tel.: +39-0432-558840

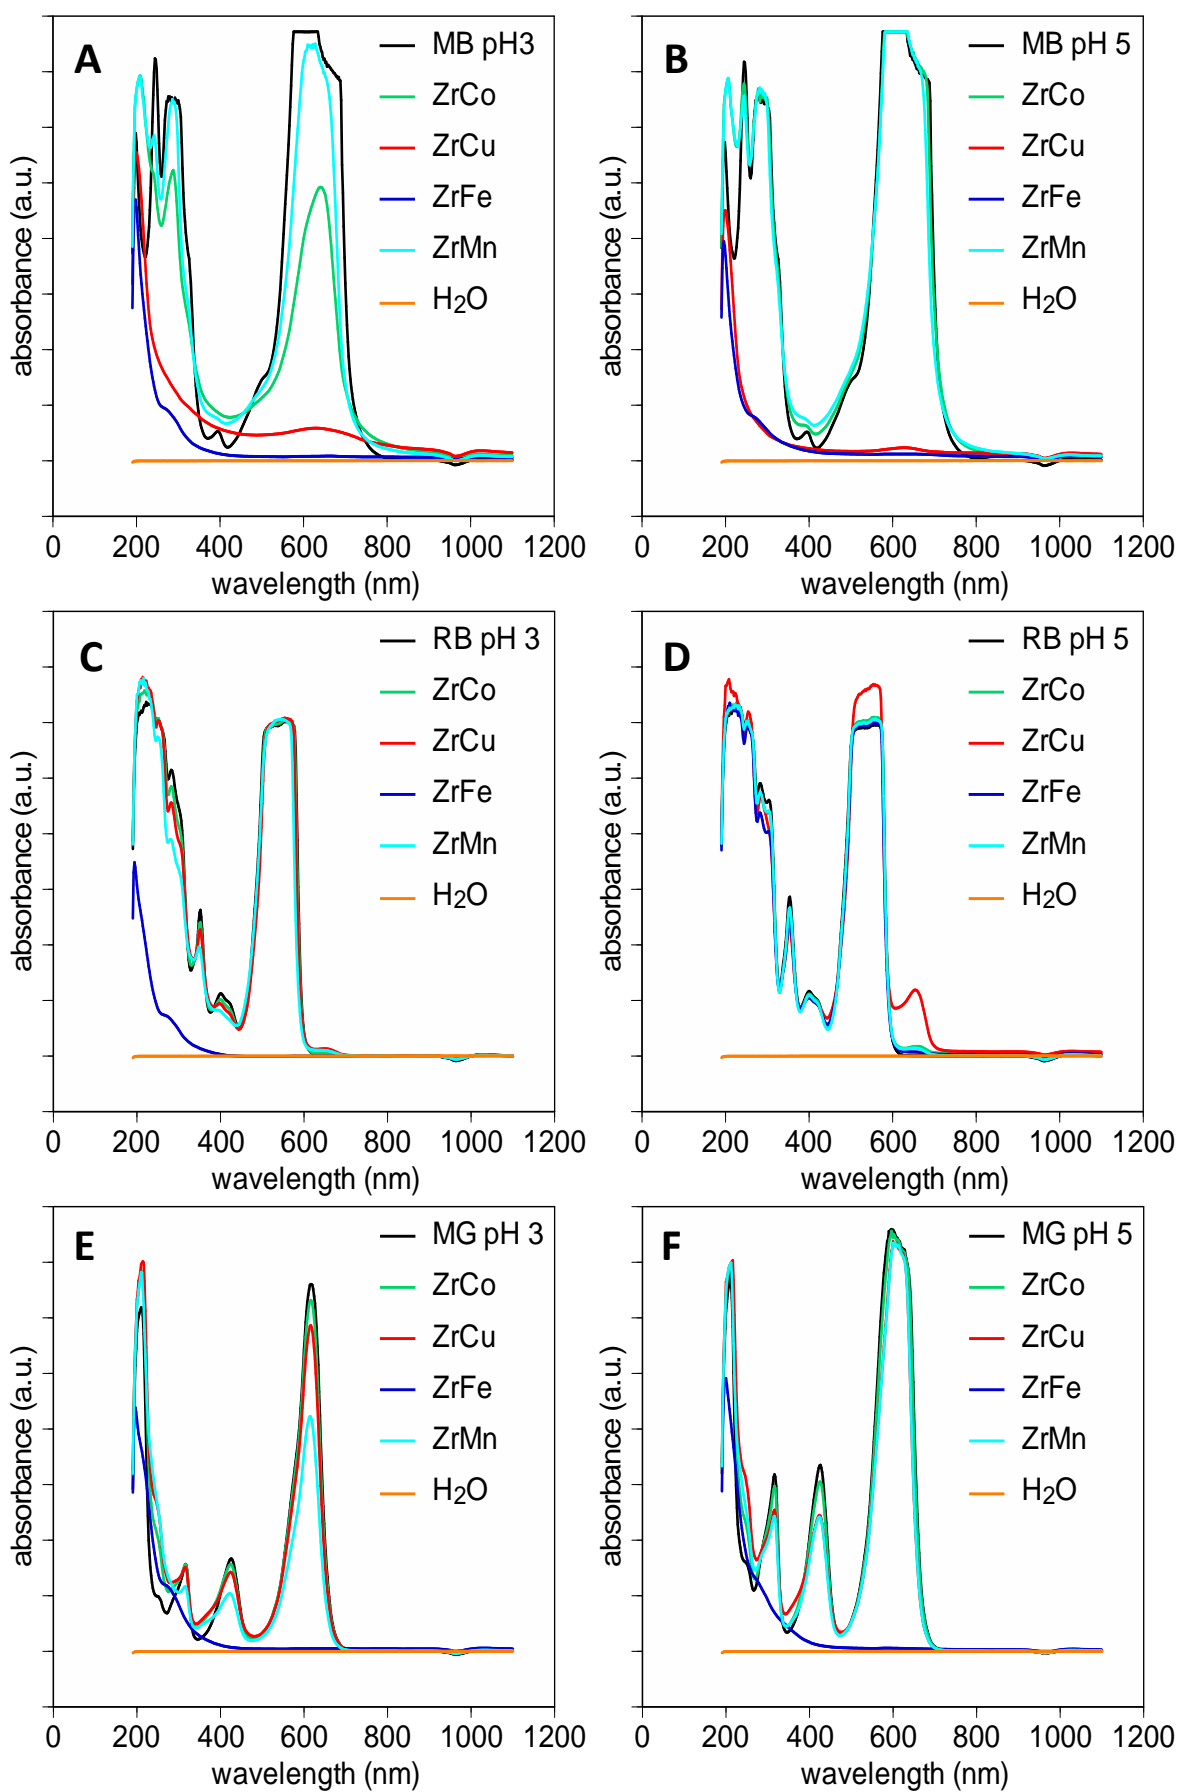

Figure S1. Absorption spectra of model solutions after Fenton treatment with monometallic catalysts. Degradation of methylene blue at A) pH 3 and B) pH 5; of rhodamine B at C) pH 3 and D) pH 5 and of malachite green at E) pH 3 and F) pH 5.

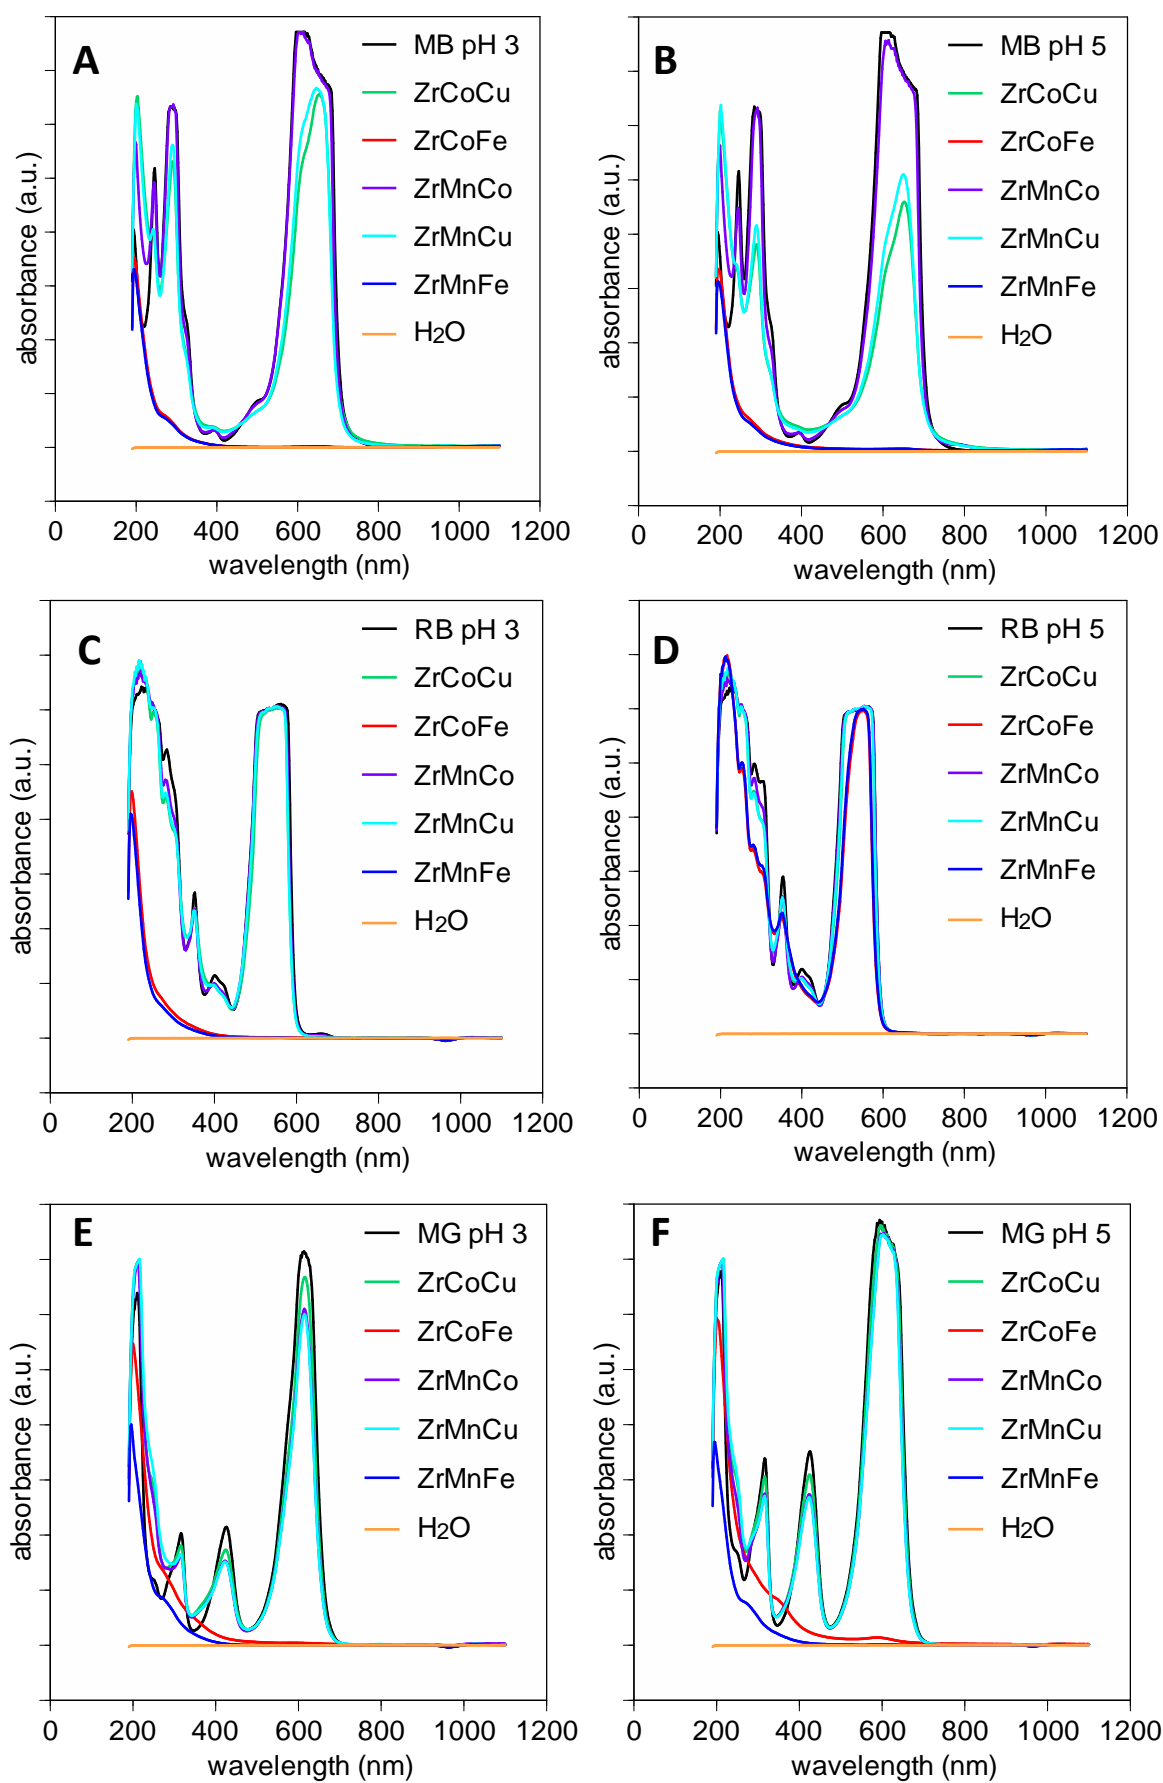

Figure S2. Absorption spectra of model solutions after Fenton treatment with BImetallic catalysts. Degradation of methylene blue at A) pH 3 and B) pH 5; of rhodamine B at C) pH 3 and D) pH 5 and of malachite green at E) pH 3 and F) pH 5
